# Supplementary material for: Changes of Mind in an Attractor Network of Decision-Making
Source: PubMed Central journal article supplement (PMC3121686; doi:10.1371/journal.pcbi.1002086), 2011-06-23
Supplement: pcbi.1002086.s006.pdf [file pcbi.1002086.s006.pdf]

Table S 1: Model summary. Parameter values are given in Table S2.

| A                     |                                                                                                                                                                         | Model Summary |  |
|-----------------------|-------------------------------------------------------------------------------------------------------------------------------------------------------------------------|---------------|--|
| <b>Populations</b>    | Four                                                                                                                                                                    |               |  |
| <b>Topology</b>       | One module                                                                                                                                                              |               |  |
| <b>Connectivity</b>   | Full connectivity, no synaptic delay                                                                                                                                    |               |  |
| <b>Neuron model</b>   | Leaky integrate-and-fire neurons, fixed voltage threshold, fixed absolute refractory periods                                                                            |               |  |
| <b>Channel models</b> | -                                                                                                                                                                       |               |  |
| <b>Synapse models</b> | Conductance-based synapses, AMPA and GABA <sub>A</sub> receptors (instantaneous rise, exponential decay), voltage-dependent NMDA receptors (exponential rise and decay) |               |  |
| <b>Plasticity</b>     | -                                                                                                                                                                       |               |  |
| <b>Input</b>          | Independent fixed-rate poisson spike trains to all neurons                                                                                                              |               |  |
| <b>Measurements</b>   | Spike activity                                                                                                                                                          |               |  |

---

| B                        |                        | Populations        |                      |
|--------------------------|------------------------|--------------------|----------------------|
| Total number of neurons  | $N = 1000$             | Excitatory neurons | $N_E = 0.8 \cdot N$  |
|                          |                        | Inhibitory neurons | $N_I = 0.2 \cdot N$  |
| <b>Name</b>              | <b>Size</b>            | <b>Name</b>        | <b>Size</b>          |
| Selective pool 1 (right) | $N_{S1} = f \cdot N_E$ | Nonselective       | $(1 - 2f) \cdot N_E$ |
| Selective pool 2 (left)  | $N_{S2} = f \cdot N_E$ | Inhibitory         | $0.2 \cdot N$        |

---

| C             |                | Connectivity       |               |               |                     |
|---------------|----------------|--------------------|---------------|---------------|---------------------|
| <b>Source</b> | <b>Target</b>  | <b>Weight</b>      | <b>Source</b> | <b>Target</b> | <b>Weight</b>       |
| inhibitory    | ↔ all          | $\omega_I = 1.125$ | nonselective  | ↔ selective   | $\omega_- = 0.8725$ |
| excitatory    | ↔ inhibitory   | $\omega = 1$       | selective i   | ↔ selective j | $\omega_- = 0.8725$ |
| excitatory    | ↔ nonselective | $\omega = 1$       | selective i   | ↔ selective i | $\omega_+ = 1.51$   |

---

| D                                |                                                              | Neuron and Synapse Model |                                                                                                                    |
|----------------------------------|--------------------------------------------------------------|--------------------------|--------------------------------------------------------------------------------------------------------------------|
| <b>Type</b>                      | Leaky integrate-and-fire neurons, conductance-based synapses |                          |                                                                                                                    |
| <b>Subthreshold dynamics</b>     | $C_m \dot{V}(t)$                                             | =                        | $-g_m(V(t) - V_L) - I_{syn}(t)$                                                                                    |
| <b>Synaptic currents</b>         | $I_{syn}(t)$                                                 | =                        | $I_{AMPA,rec}(t) + I_{NMDA,rec}(t) + I_{GABA}(t) + I_{AMPA,ext}(t)$                                                |
|                                  | $I_{AMPA,ext}(t)$                                            | =                        | $g_{AMPA,ext}(V(t) - V_E) \sum_{j=1}^{N_{ext}} s_j^{AMPA,ext}(t)$                                                  |
|                                  | $I_{AMPA,rec}(t)$                                            | =                        | $g_{AMPA,rec}(V(t) - V_E) \sum_{j=1}^{N_E} \omega_j s_j^{AMPA,rec}(t)$                                             |
|                                  | $I_{NMDA,rec}(t)$                                            | =                        | $\frac{g_{NMDA}(V(t) - V_E)}{1 + [Mg^{2+}] \exp(-0.062V(t))/3.57}} \times \sum_{j=1}^{N_E} \omega_j s_j^{NMDA}(t)$ |
|                                  | $I_{GABA}(t)$                                                | =                        | $g_{GABA}(V(t) - V_I) \sum_{j=1}^{N_I} \omega_j s_j^{GABA}(t)$                                                     |
| <b>Fraction of open channels</b> | $\frac{ds_j^X(t)}{dt}$                                       | =                        | $-\frac{s_j^X(t)}{\tau_{X,decay}} + \sum_k \delta(t - t_j^k), \quad X = AMPA, GABA$                                |
|                                  | $\frac{ds_j^{NMDA}(t)}{dt}$                                  | =                        | $-\frac{s_j^{NMDA}(t)}{\tau_{NMDA,decay}} + \alpha x_j(t)(1 - s_j^{NMDA}(t))$                                      |
|                                  | $\frac{dx_j(t)}{dt}$                                         | =                        | $-\frac{x_j(t)}{\tau_{NMDA,rise}} + \sum_k \delta(t - t_j^k)$                                                      |
| <b>Spiking</b>                   | if $V(t) \geq V_{th} \wedge t > t^* + \tau_{ref}$            |                          |                                                                                                                    |
|                                  | 1. set $t^* = t$                                             |                          |                                                                                                                    |
|                                  | 2. emit spike at time $t^*$                                  |                          |                                                                                                                    |
|                                  | 3. set $V(t) = V_{reset}$                                    |                          |                                                                                                                    |

---

| E                 |                                                                                                                            | Input |  |
|-------------------|----------------------------------------------------------------------------------------------------------------------------|-------|--|
| <b>Type</b>       | <b>Description</b>                                                                                                         |       |  |
| Poisson generator | Fixed rate $\nu = \nu_{ext} + \nu_{1,2}$ , with $\nu_{ext} = 2.4$ kHz, $\nu_{1,2} = sel.$ inputs, one generator per neuron |       |  |

---

| F                                                                                                                                                                                               |  | Measurements |  |
|-------------------------------------------------------------------------------------------------------------------------------------------------------------------------------------------------|--|--------------|--|
| Spike activity: firing-rates were calculated using the spike count in a 50 ms time window shifted by 5 ms steps and dividing by the number of neurons in the population and by the window size. |  |              |  |
