# Supplementary material for: Changes of Mind in an Attractor Network of Decision-Making
Source: PubMed Central journal article supplement (PMC3121686; doi:10.1371/journal.pcbi.1002086), 2011-06-23
Supplement: pcbi.1002086.s007.pdf [file pcbi.1002086.s007.pdf]

Table S 2: Default parameter set used in the integrate-and-fire simulation

| Parameter                          | Value      | Parameter                          | Value                 |
|------------------------------------|------------|------------------------------------|-----------------------|
| $N_E$                              | 800        | $N_I$                              | 200                   |
| $V_E$                              | 0 mV       | $V_I$                              | -70 mV                |
| $V_L$                              | -70 mV     | $N_{\text{ext}}$                   | 800                   |
| $V_{\text{thr}}$                   | -50 mV     | $\nu_{\text{ext}}$                 | 2.4 kHz               |
| $V_{\text{reset}}$                 | -55 mV     | $f$                                | 0.20                  |
| $\omega_+$                         | 1.51       | $\omega_I$                         | 1.125                 |
| $\omega_-$                         | 0.8725     | $\alpha$                           | $0.5 \text{ ms}^{-1}$ |
| $C_m$ (excitatory)                 | 0.5 nF     | $C_m$ (inhibitory)                 | 0.2 nF                |
| $g_m$ (excitatory)                 | 25 nS      | $g_m$ (inhibitory)                 | 20 nS                 |
| $\tau_{\text{ref}}$ (excitatory)   | 2 ms       | $\tau_{\text{ref}}$ (inhibitory)   | 1 ms                  |
| $g_{\text{AMPA,ext}}$ (excitatory) | 2.08 nS    | $g_{\text{AMPA,ext}}$ (inhibitory) | 1.62 nS               |
| $g_{\text{AMPA,rec}}$ (excitatory) | 0.1872 nS  | $g_{\text{AMPA,rec}}$ (inhibitory) | 0.1458 nS             |
| $g_{\text{GABA}}$ (excitatory)     | 1.25 nS    | $g_{\text{GABA}}$ (inhibitory)     | 0.973 nS              |
| $g_{\text{NMDA}}$ (excitatory)     | 0.30084 nS | $g_{\text{NMDA}}$ (inhibitory)     | 0.23736 nS            |
| $\tau_{\text{NMDA,decay}}$         | 100 ms     | $\tau_{\text{NMDA,rise}}$          | 2 ms                  |
| $\tau_{\text{AMPA}}$               | 2 ms       | $\tau_{\text{GABA}}$               | 10 ms                 |
