# Supplementary material for: Changes of Mind in an Attractor Network of Decision-Making
Source: PLOS journal article supplement (doi:10.1371/journal.pcbi.1002086), 2011-06-23
Supplement: S1 (10.1371/journal.pcbi.1002086.s001) [file journal.pcbi.1002086.s001]

301 Moved Permanently

# Moved Permanently

The document has moved here.

---

Apache Server at www.ploscompbiol.org Port 80
